# Supplementary material
Source: PubMed Central journal article supplement (PMC6128668)
Supplement: NIHMS946938-supplement-Supplemental_Data_File___doc___tif__pdf__etc___1.pdf [file NIHMS946938-supplement-Supplemental_Data_File___doc___tif__pdf__etc___1.pdf]

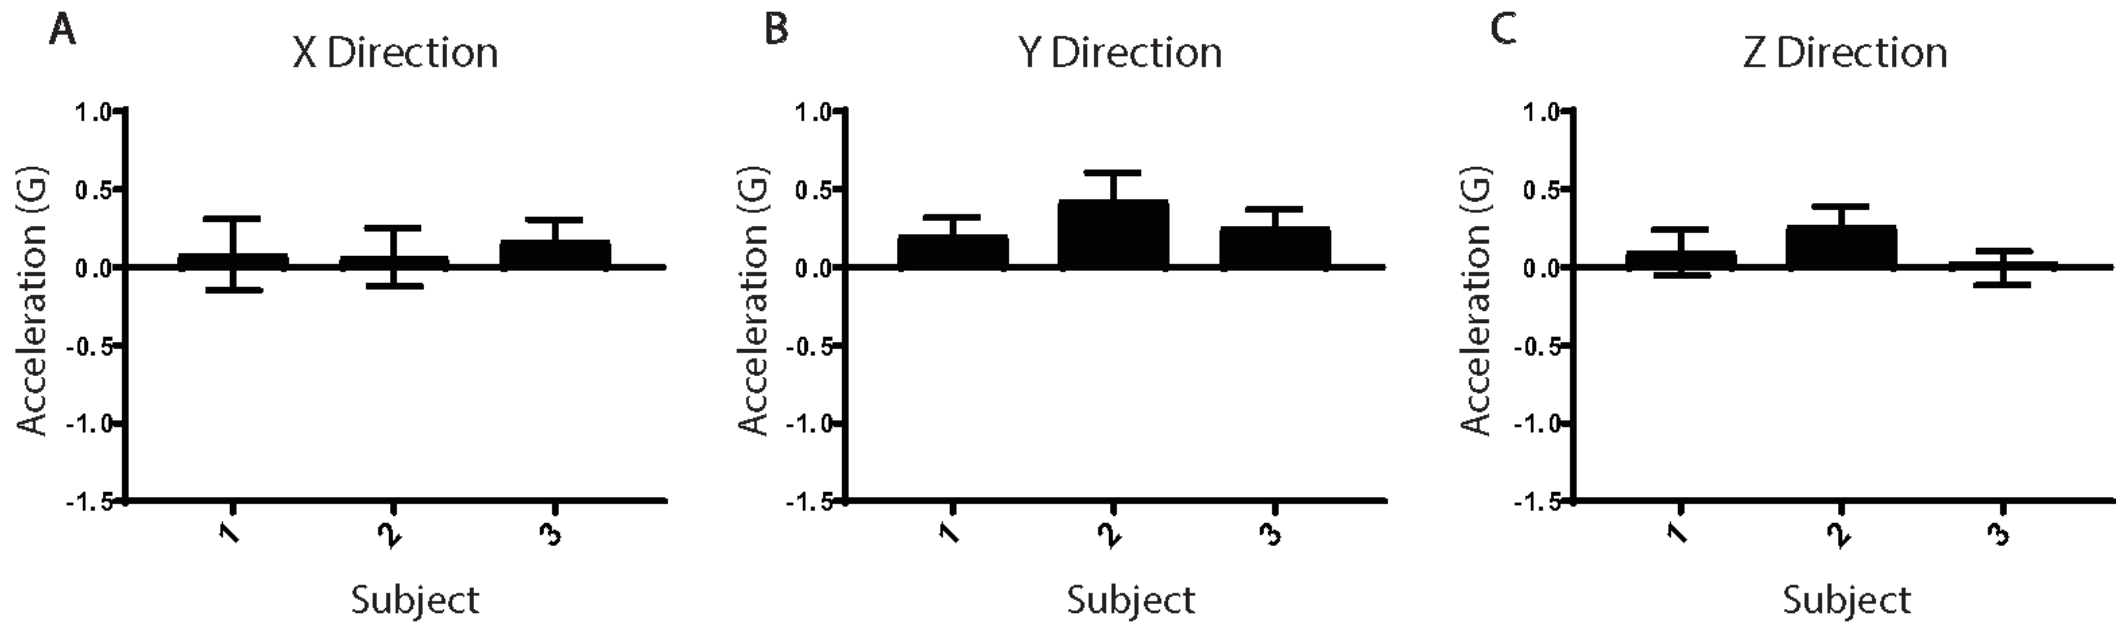

**Figure S1.** Average Acceleration of Gross Translation Motion. (A) Acceleration averaged from all three subjects in the x-direction. (B) Acceleration averaged from all three subjects in the y-direction. (C) Acceleration averaged from all three subjects in the z-direction. Data is displayed as mean  $\pm$  one standard deviation.
