# Supplementary material
Source: PubMed Central journal article supplement (PMC6128668)
Supplement: NIHMS946938-supplement-Supplemental_Data_File___doc___tif__pdf__etc___2.pdf [file NIHMS946938-supplement-Supplemental_Data_File___doc___tif__pdf__etc___2.pdf]

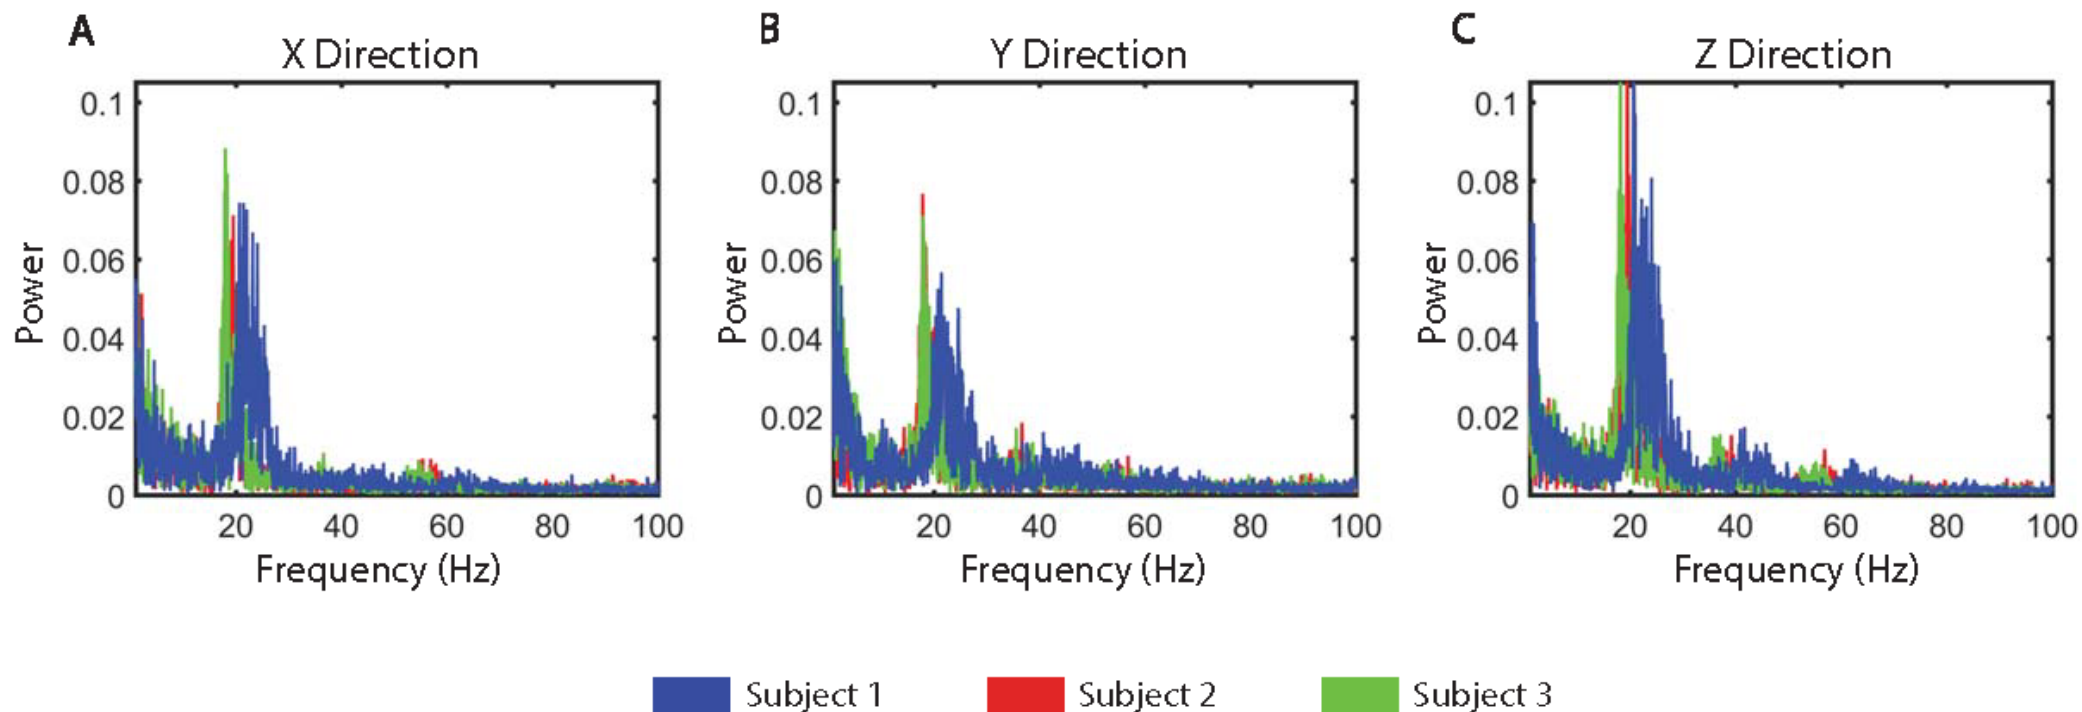

**Figure S2.** Frequency Spectrum of Hygiene Motion. (A) Transformed data from all three subjects in the X Direction. (B) Transformed data from all three subjects in the Y Direction. (C) Transformed data from all three subjects in the Z Direction.
