# Supplementary material
Source: PubMed Central journal article supplement (PMC6128668)
Supplement: NIHMS946938-supplement-Supplemental_Data_File___doc___tif__pdf__etc___3.pdf [file NIHMS946938-supplement-Supplemental_Data_File___doc___tif__pdf__etc___3.pdf]

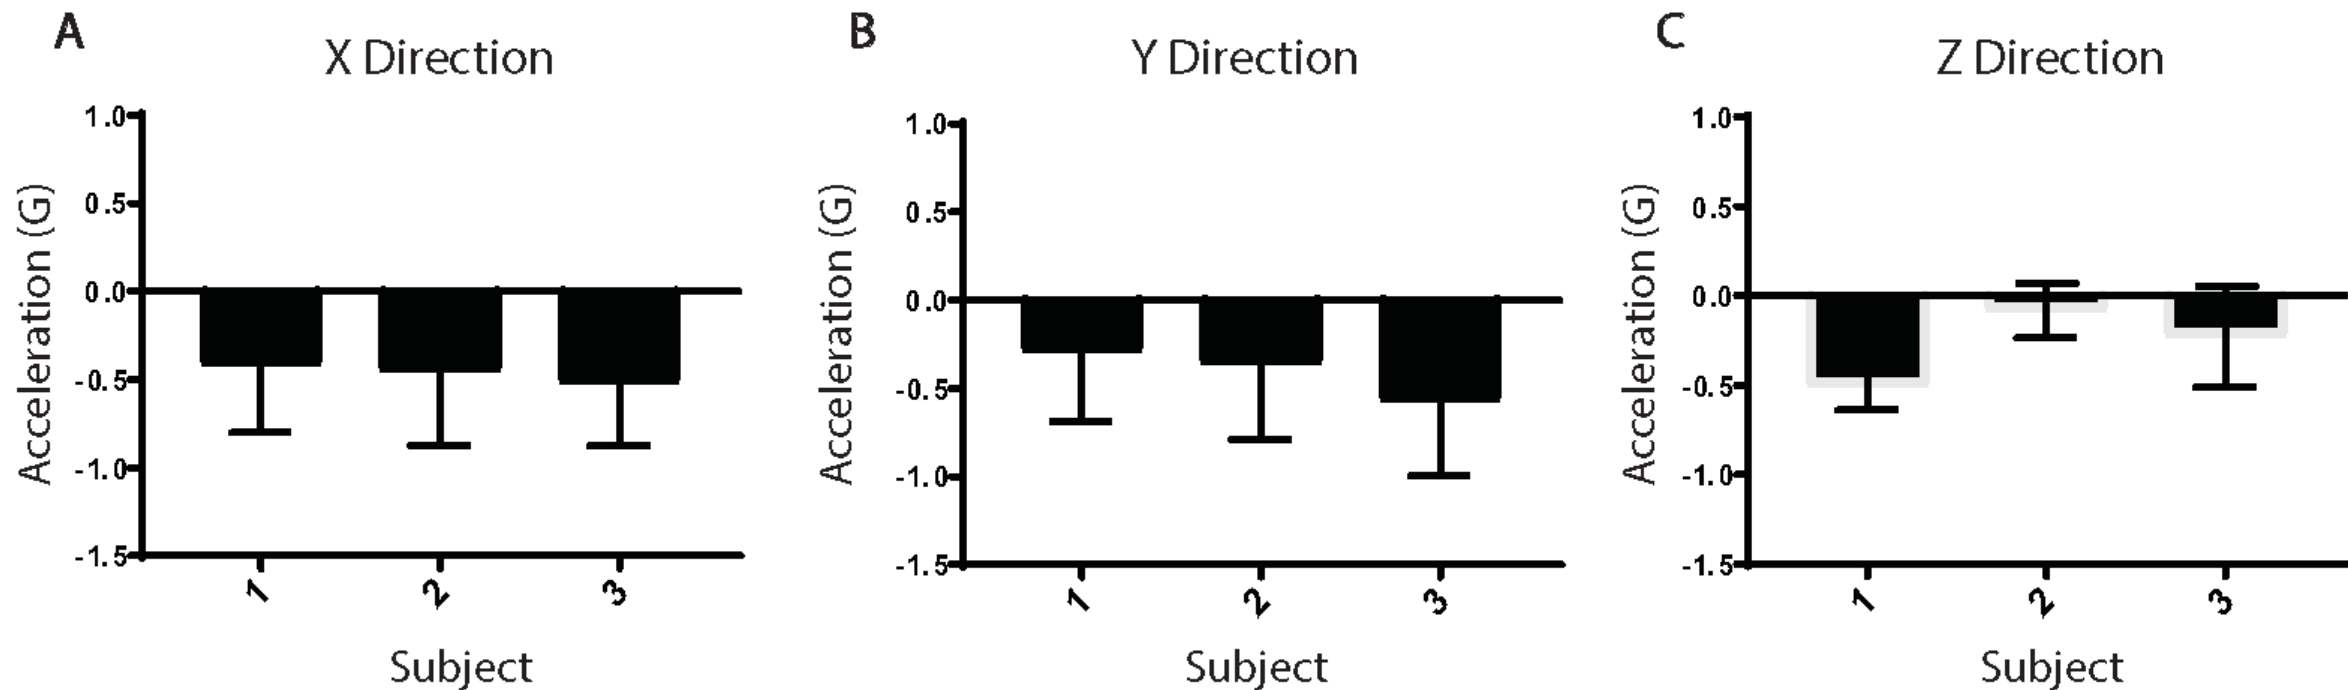

**Figure S3.** Average Acceleration of Hydration Motion. (A) Data from all three subjects in the X Direction. (B) Data from all three subjects in the Y Direction. (C) Data from all three subjects in the Z Direction. Data is displayed as mean  $\pm$  one standard deviation.
